# Supplementary material for: Kir4.2 mediates proximal potassium effects on glutaminase activity and kidney injury
Source: PubMed Central journal article supplement — Cell Rep. Author manuscript; Available in PMC 2023 Jan 9. (PMC9827473; doi:10.1016/j.celrep.2022.111840), 2022-12-20
Supplement: NIHMS1860000-supplement-1.pdf [file NIHMS1860000-supplement-1.pdf]

**Cell Reports, Volume 41**

**Supplemental information**

**Kir4.2 mediates proximal potassium effects  
on glutaminase activity and kidney injury**

**Andrew S. Terker, Yahua Zhang, Juan Pablo Arroyo, Shirong Cao, Suwan Wang, Xiaofeng Fan, Jerod S. Denton, Ming-Zhi Zhang, and Raymond C. Harris**

Supplemental Figure 1

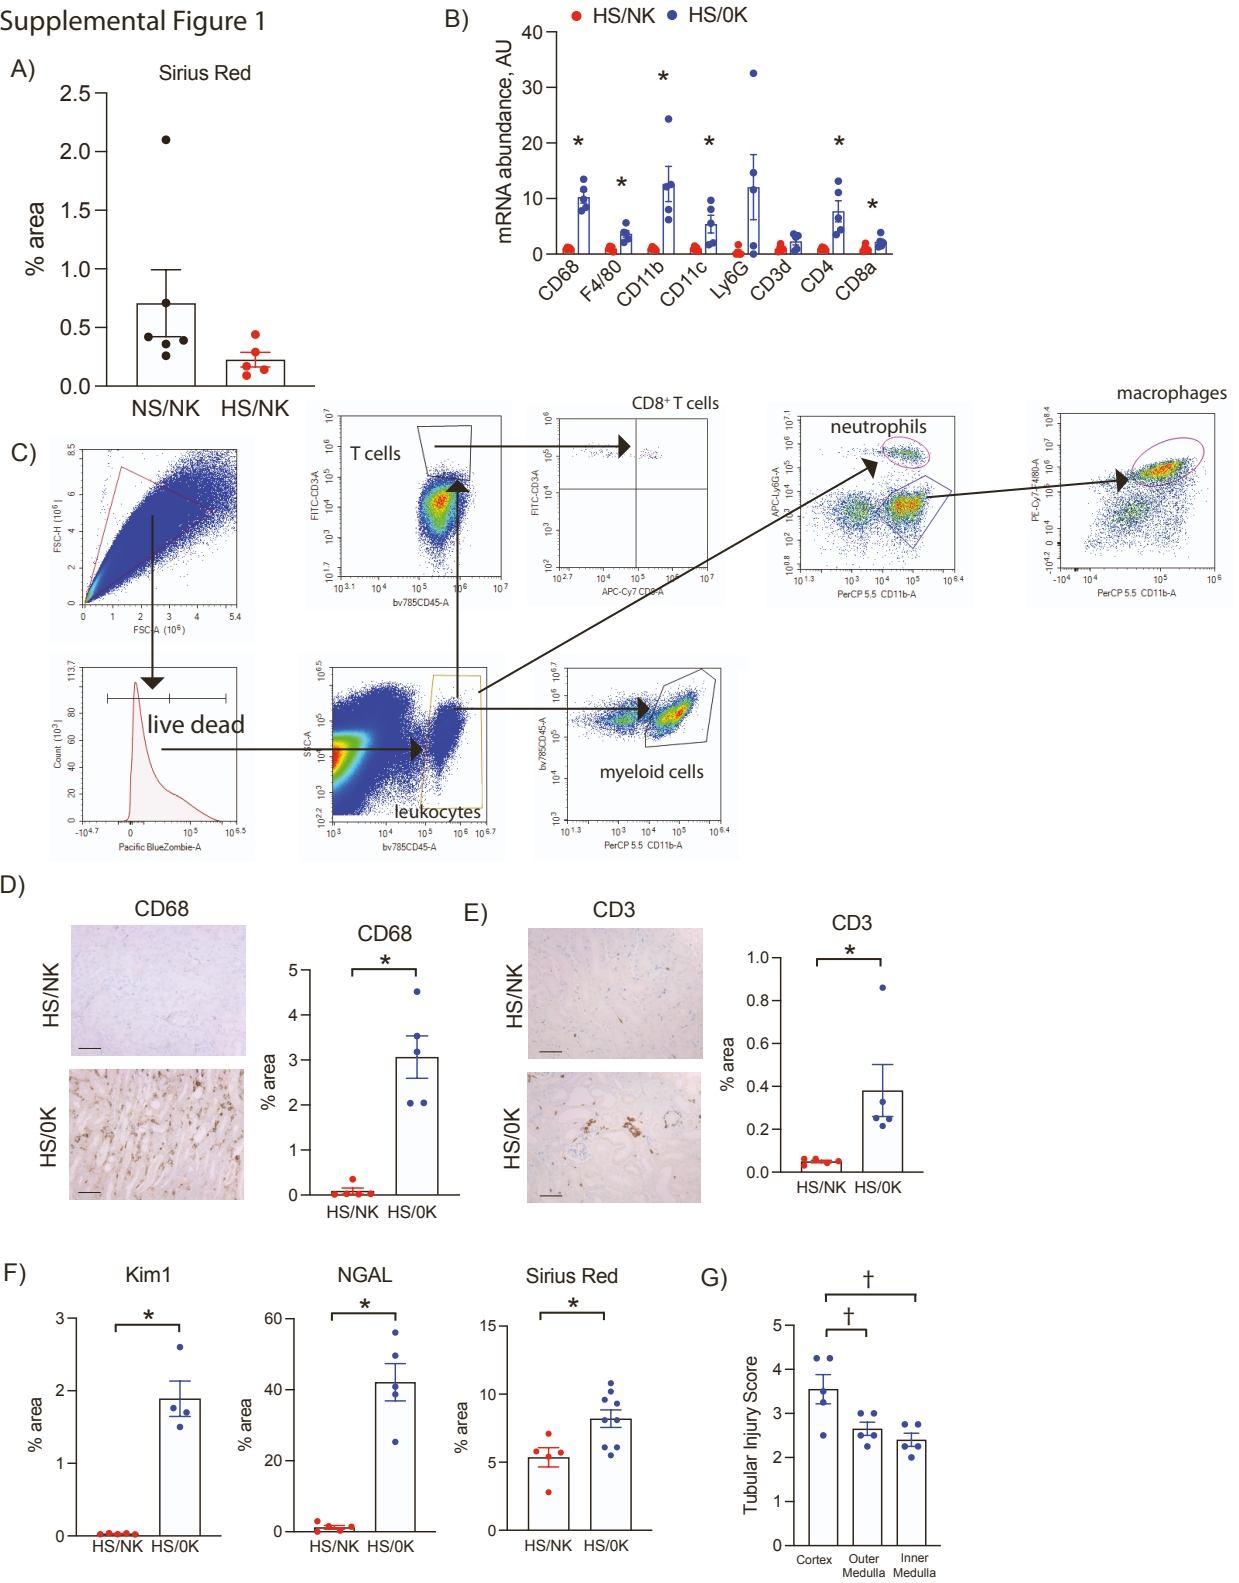

**Supplemental Figure 1 Reduced dietary K<sup>+</sup> causes inflammation.** A) Quantification of kidney Sirius red staining from animals that consumed NS/NK and HS/NK as shown in figure 1b. B) Total kidney transcript abundance of immune cell genes in animals that consumed a HS/NK and HS/0K diet for three weeks. C) Gating strategy used for flow cytometry. D, E) Representative immunohistochemical images of kidneys from animals that consumed diets as in A. Sections were stained for D) CD68 and E) CD3. F) Quantification of Kim1, NGAL, and Sirius red staining for data presented in figure 1G, H. G) Tubular injury score calculated for indicated kidney anatomical region of HS/0K fed mice. N<sub>≥</sub>5 for all panels. \*, P<0.05 by unpaired t-test or Mann-Whitney. †, P<0.05 by one-way ANOVA with Dunnett's multiple comparison. Scale bar = 50 μm. Normality was determined by Shapiro-Wilk test.

Supplemental Figure 2

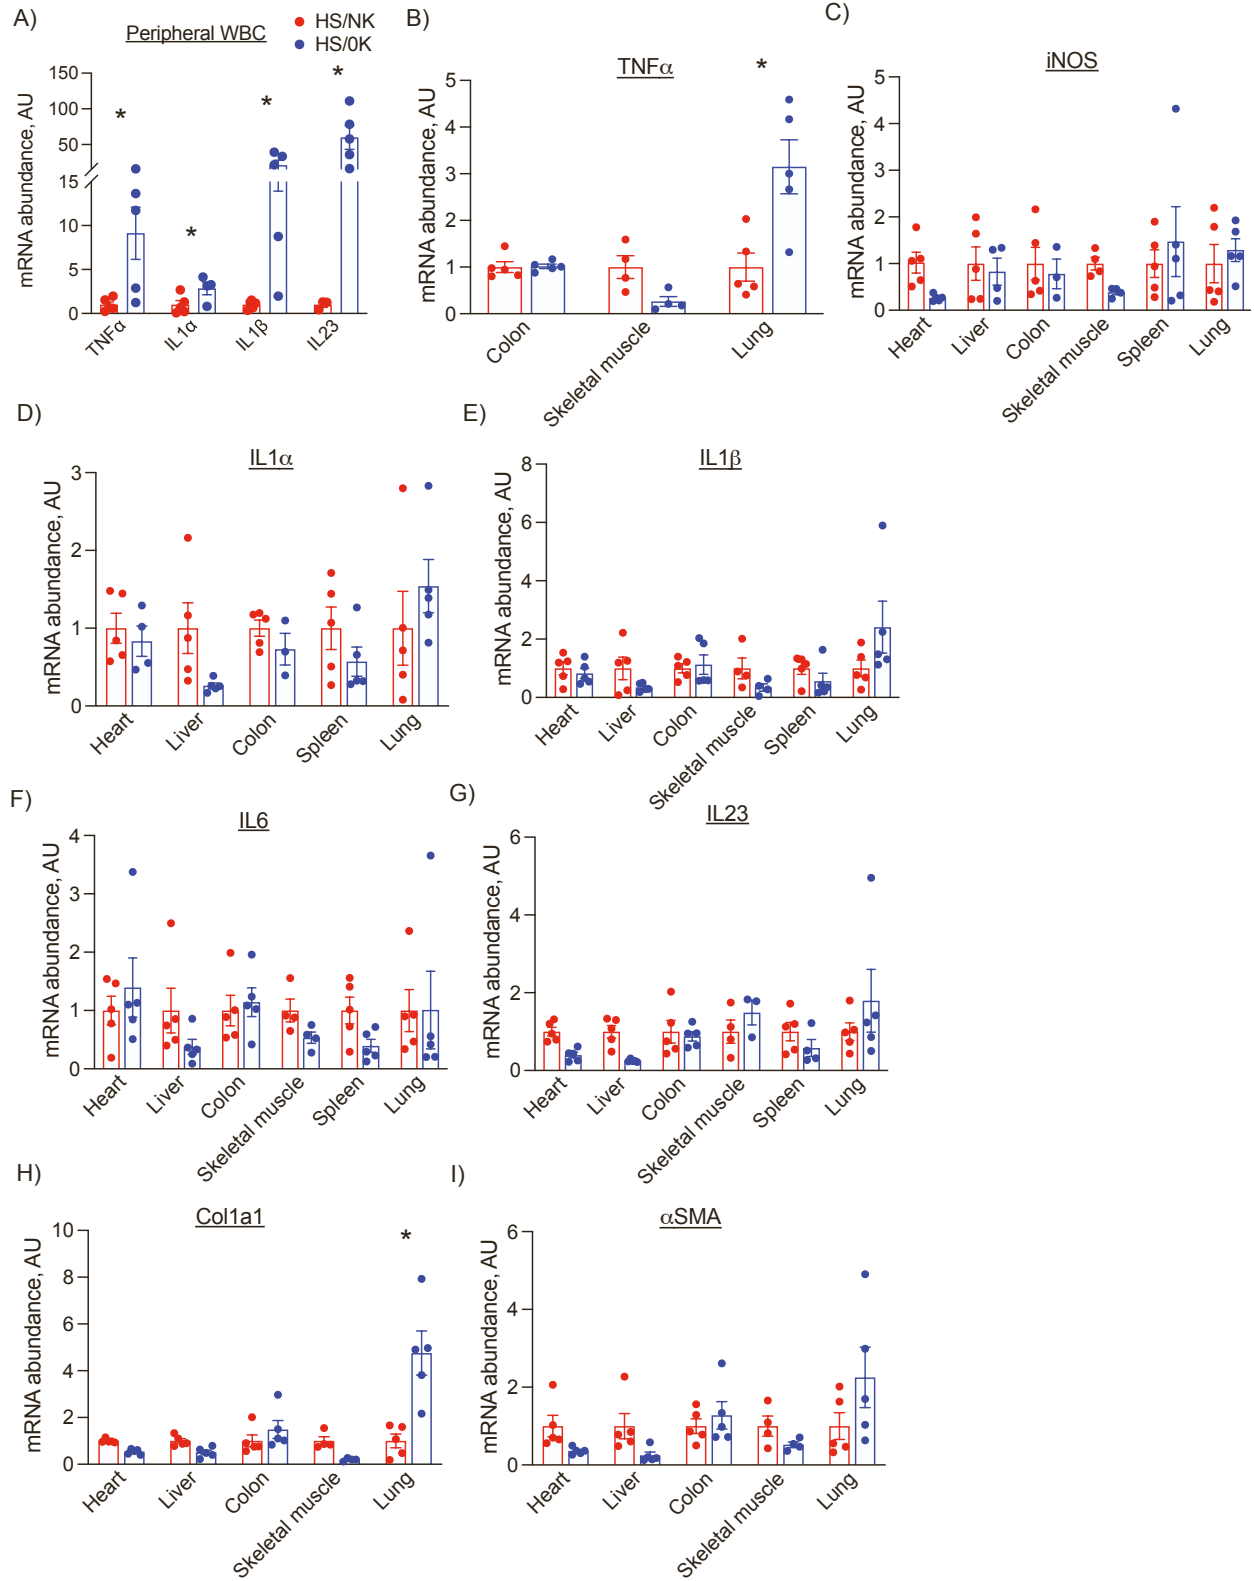

**Supplemental Figure 2 Reduced dietary K<sup>+</sup> does not affect inflammatory or fibrotic transcript abundance in non-renal solid organs.** A) Quantitative PCR data from peripheral leukocyte pellets obtain from animals treated with HS/NK and HS/0K. B-I) Whole organ transcript abundance of B) TNF $\alpha$  , C) iNOS, D) IL1 $\alpha$ , E) IL1 $\beta$ , F) IL6, G) IL23, H) Coll1a1, and I)  $\alpha$  SMA in heart, liver, colon, skeletal muscle, spleen, and lung from animals that consumed a HS/NK and HS/0K diet for three weeks. N=5 per group. \*, P<0.05 by unpaired t-test. Normality was determined by Shapiro-Wilk test.

Supplemental Figure 3

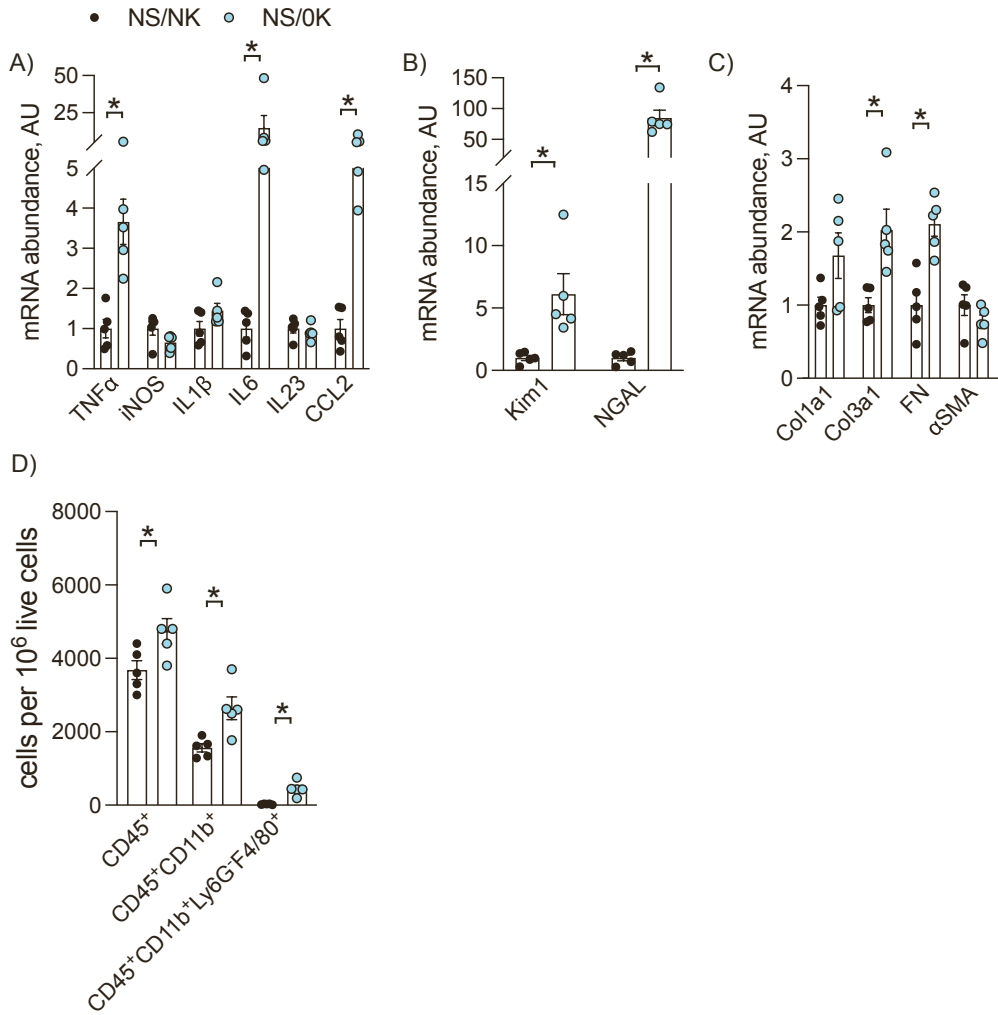

**Supplemental Figure 3 Reduced dietary K<sup>+</sup>, in the absence of high salt intake, causes kidney injury.** Total kidney transcript abundance of A) inflammatory, B) injury, and C) fibrosis genes in animals that consumed a NS/NK diet compared with those that consumed a NS/OK diet for three weeks. D) Effects of the same dietary treatment as A-C on kidney abundance of immune cell subsets. \*, P<0.05 by unpaired t-test or Mann-Whitney. Normality was determined by Shapiro-Wilk test. Additional physiological data presented in supplemental table 1.

Supplemental Figure 4

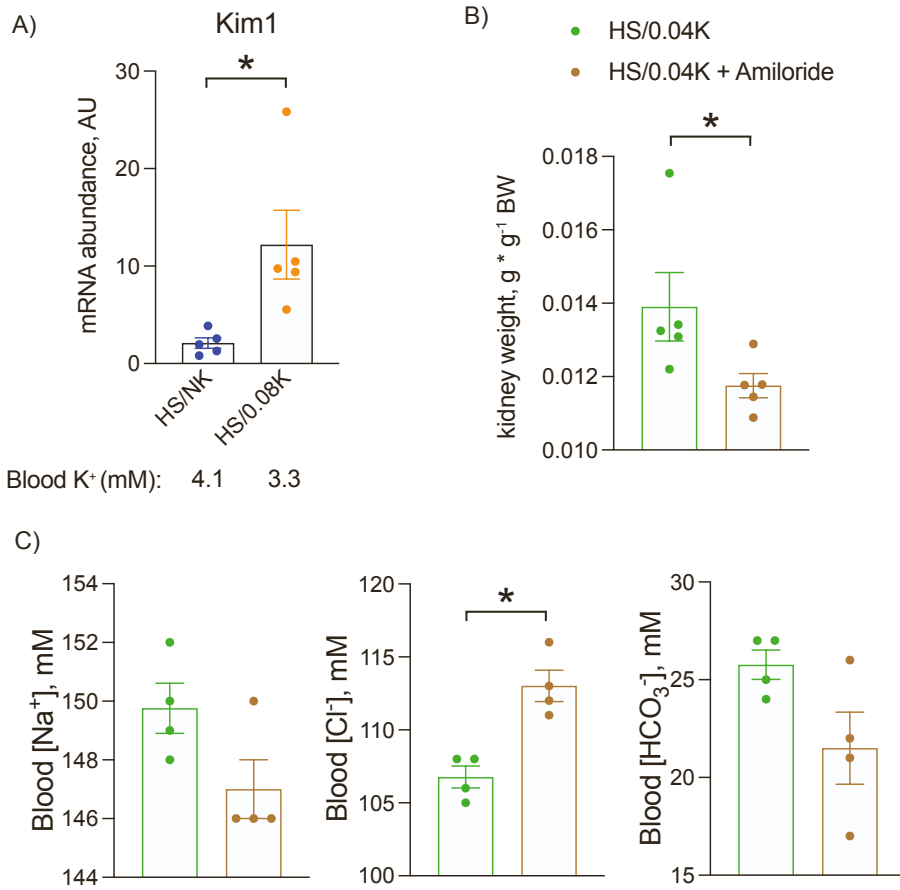

**Supplemental Figure 4 Effects of amiloride on kidney weight and blood electrolytes from mice on a HS/0.04K**

**diet.** A) Total kidney Kim1 transcript abundance from animals that were fed either HS/NK or HS with 0.08% K<sup>+</sup> (HS/0.08K). Average blood K<sup>+</sup> are indicated below corresponding groups. B) Kidney weight from animals that consumed HS/0.04K for three weeks on normal drinking water and amiloride-supplemented water. C) Blood electrolytes from animals treated as in B. N=5 per group for A and B and N=4 per group for C. \*, p<0.05 by unpaired t-test or Mann-Whitney. Normality was determined by Shapiro-Wilk test.

## Supplemental Figure 5

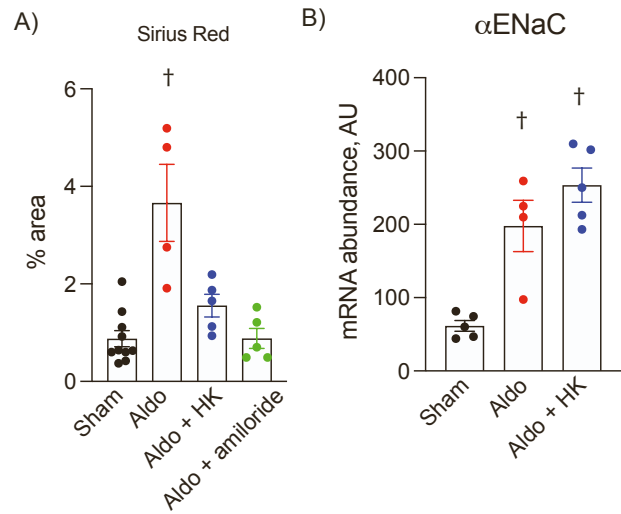

**Supplemental Figure 5 Effects of aldosterone on fibrosis and  $\alpha$ ENaC mRNA abundance.** A) Sirius red quantification from staining as presented in figure 3e B) Total kidney  $\alpha$ ENaC mRNA transcript abundance from animals that underwent a sham procedure, aldosterone infusion, and aldosterone infusion while also consuming a high  $K^+$  diet. All animals were fed a high salt diet during the treatment period. N=5 for sham, aldo + HK, and aldo + amiloride groups and N=4 for the aldo group. †,  $P < 0.05$  by Kruskal-Wallis followed by Dunn's multiple comparison vs Sham for A and one-way ANOVA with Dunnett's multiple comparison vs Sham for B. Normality was determined by Shapiro-Wilk test.



Supplemental Figure 6

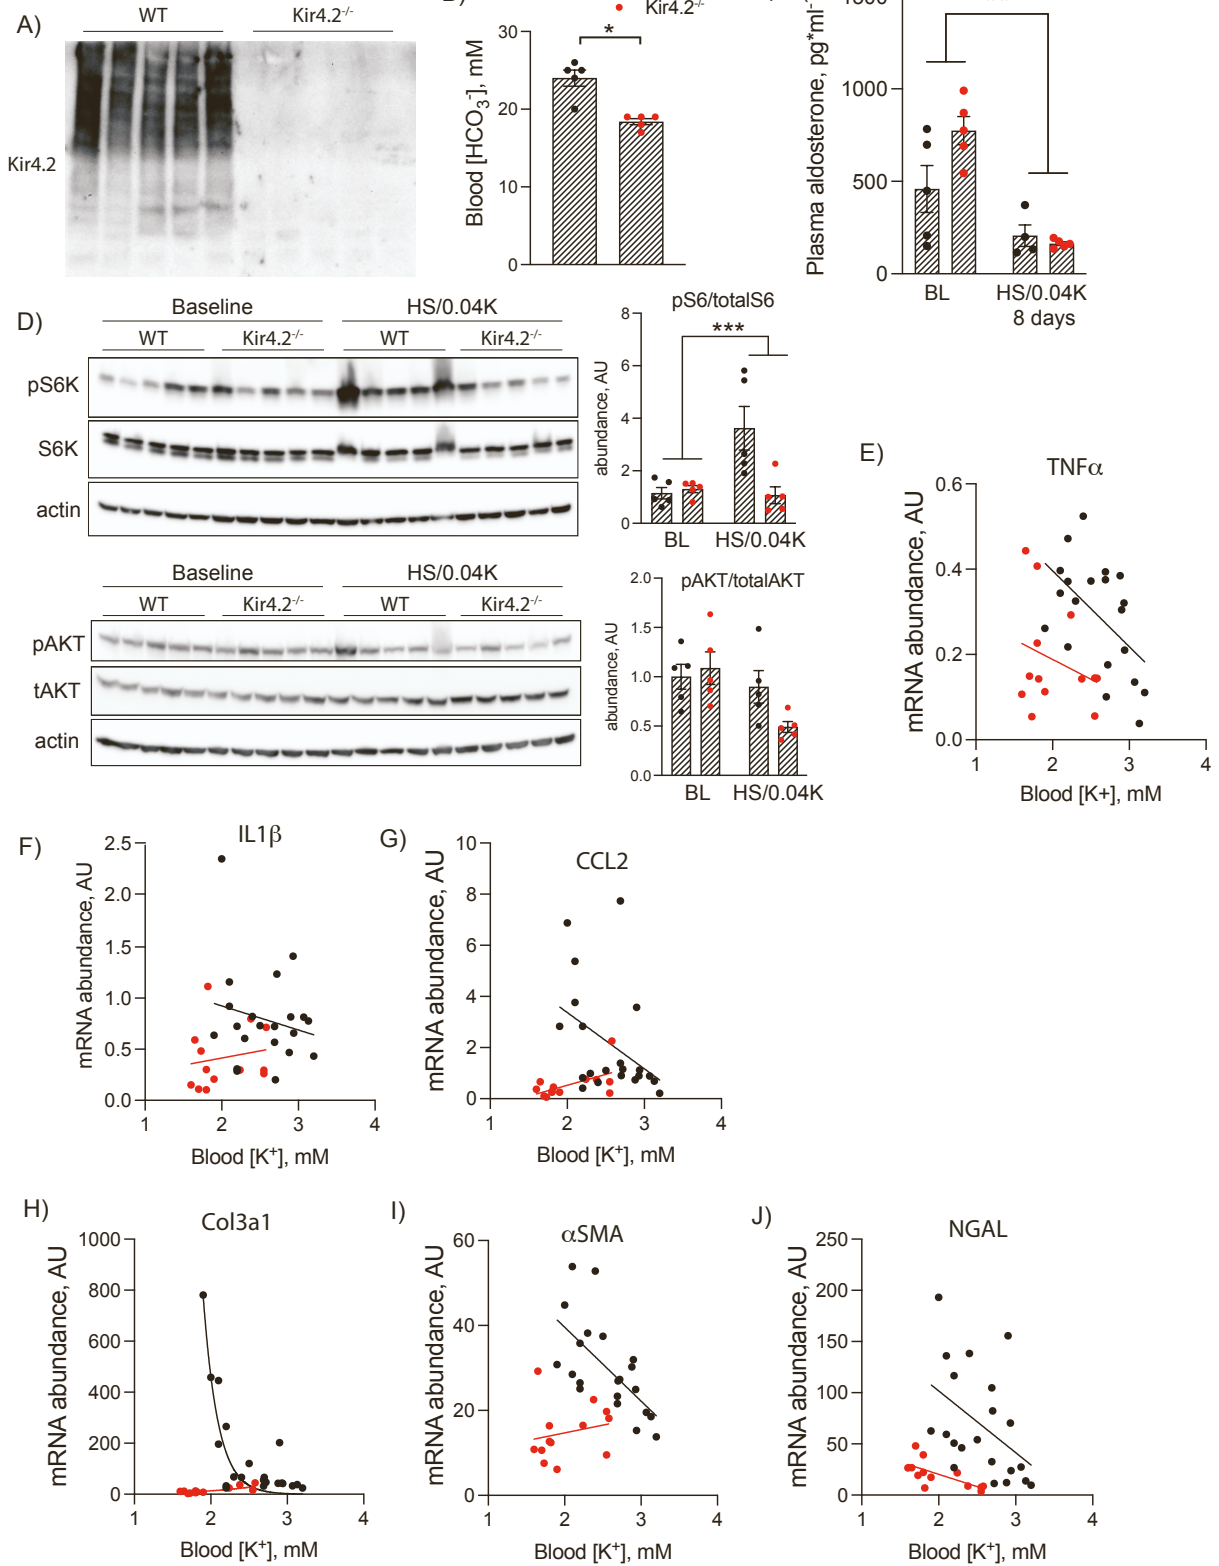

**Supplemental Figure 6 Effects of dietary K<sup>+</sup> restriction on Kir4.2<sup>-/-</sup> animals.** A) Kidney Western blot for Kir4.2 from WT and Kir4.2<sup>-/-</sup> animals. Actin is the same as in figure 7d. B) Blood HCO<sub>3</sub><sup>-</sup> from WT and Kir4.2<sup>-/-</sup> mice following consumption of a HS/0.04K diet for eight days. C) Plasma aldosterone concentrations from WT and Kir4.2<sup>-/-</sup> mice at baseline and following consumption of a HS/0.04K diet for eight days. D) Kidney Western blot analysis of phospho-S6 kinase, total S6 kinase, phospho-AKT, and total AKT from animals treated as in C. E-J) Relationship between total kidney mRNA abundance of indicated transcript and blood K<sup>+</sup>. Black represents WT mice and red represents Kir4.2 knockouts. \*, P<0.05 by Mann-Whitney test. \*\*, P<0.05 for HS/0.04K diet reducing aldosterone levels vs baseline without an effect of genotype as compared by two-way ANOVA. \*\*\*, P<0.05 for interaction by two-way ANOVA. For E-G and J, differences in slopes were not statistically different between genotypes, though transcript abundances for knockouts were lower than WT (P<0.05). For H and I, the differences in slopes are statistically significant (P<0.05). N ≥ 5 per group. Normality was determined by Shapiro-Wilk test.

Supplemental Figure 7

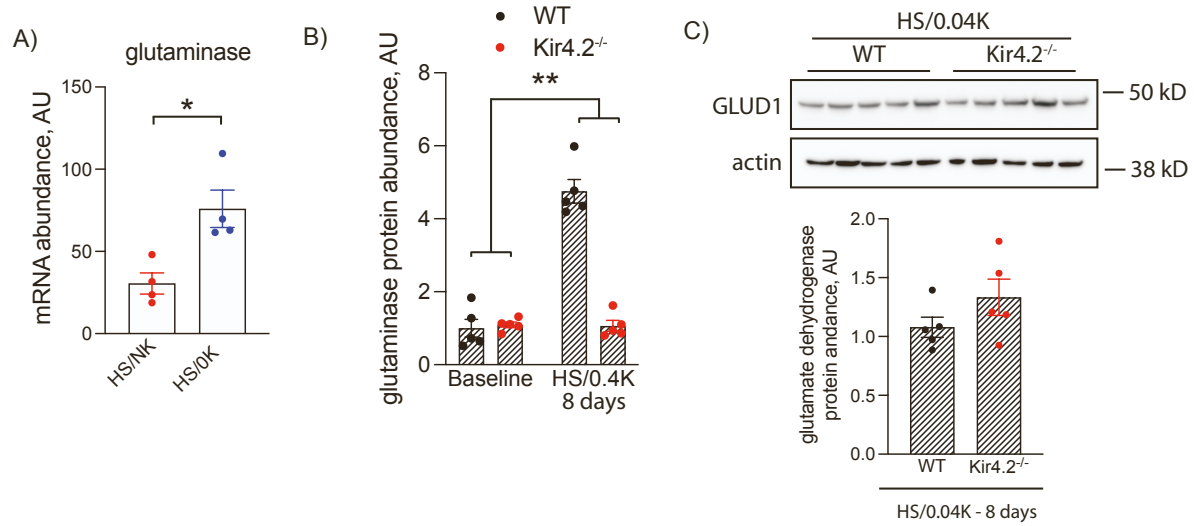

**Supplemental Figure 7 Quantification of kidney glutaminase and glutamate dehydrogenase abundances. A)**

Total kidney glutaminase mRNA abundance in WT animals that were treated with a HS/NK diet and a HS/0K diet for three weeks. B) Glutaminase protein abundance quantification from figure 6b. C) Glutamate dehydrogenase protein abundance and quantification from WT and Kir4.2<sup>-/-</sup> animals fed a HS/0.04K diet for 8 days. N=4 per group for A and N=5 per group for B and C. \*, P<0.05 by unpaired t-test; \*\*P<0.05 for interaction by two-way ANOVA. Normality was determined by Shapiro-Wilk test.

Supplemental Figure 8

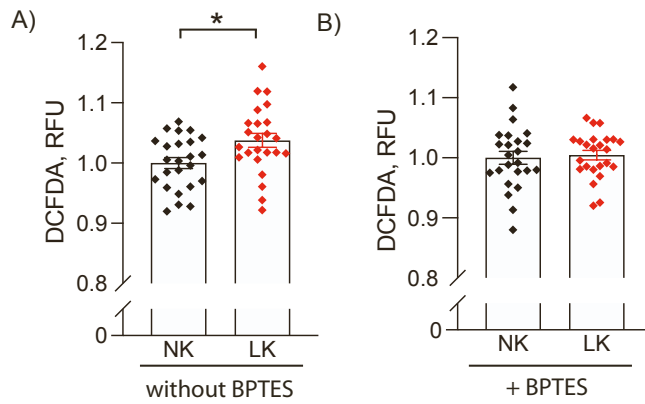

**Supplemental Figure 8 Effects of low K<sup>+</sup> culture and glutaminase inhibition on ROS production in hRPTECs.**

A) Effects of normal or low K<sup>+</sup> culture on H<sub>2</sub>DCFDA fluorescence in hRPTECs. B) Effects of normal or low K<sup>+</sup> culture on H<sub>2</sub>DCFDA fluorescence in the presence of BPTES. RFU, relative fluorescence units. N=24 per group. \*, p<0.05 by unpaired t-test. Normality was determined by Shapiro-Wilk test.

Supplemental Figure 9

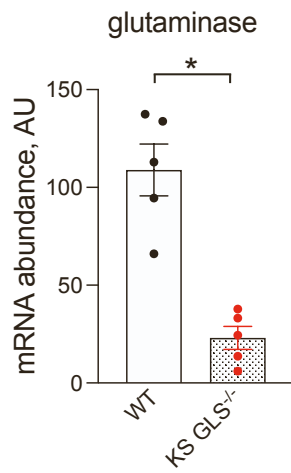

**Supplemental Figure 9 Total kidney mRNA transcript abundance of glutaminase from control and KS GLS<sup>-/-</sup> animals.** N=5 per group. \*, p<0.05 by unpaired t-test. Normality was determined by Shapiro-Wilk test.

Supplemental Table 1. Additional physiological data for NS/NK and NS/OK-treated mice (Supplemental Figure 3). Data are presented as mean  $\pm$  SEM. \* indicates  $P < 0.05$  by Mann-Whitney test.

|                       | Treatment             |                       |
|-----------------------|-----------------------|-----------------------|
|                       | NS/NK                 | NS/OK                 |
| BW, g                 | 25.3 $\pm$ 0.69       | 23.3 $\pm$ 0.55       |
| kidney weight, g/g BW | 0.0119 $\pm$ 0.00043* | 0.0152 $\pm$ 0.00025* |
| Na, mM                | 141.9 $\pm$ 0.32      | 141.5 $\pm$ 0.67      |
| K, mM                 | 3.6 $\pm$ 0.07*       | 2.4 $\pm$ 0.06*       |
| Cl, mM                | not measured          | not measured          |
| HCO <sub>3</sub> , mM | not measured          | not measured          |
| BUN, mg/dL            | not measured          | not measured          |

Supplemental Table 2a. Additional physiological data for dietary K<sup>+</sup> titration (Figure 2). Data are presented as mean ± SEM. \*\* indicates P<0.05 by Kruskal-Wallis followed by Dunn's multiple comparison test vs 0.8% group.

|                       | Dietary K, % w/w |               |              |               |              |              |              |
|-----------------------|------------------|---------------|--------------|---------------|--------------|--------------|--------------|
|                       | 0                | 0.02          | 0.04         | 0.08          | 0.27         | 0.53         | 0.8          |
| BW, g                 | 22.4 ± 0.90**    | 23.5 ± 0.56** | 24.3 ± 1.10  | 25.5 ± 0.55   | 27.4 ± 1.22  | 27.5 ± 0.54  | 28.3 ± 1.00  |
| Na, mM                | 151.8 ± 1.11     | 148.3 ± 0.94  | 147.8 ± 0.63 | 148 ± 0.45    | 146 ± 0.71   | 144.2 ± 0.66 | 146.8 ± 0.2  |
| Cl, mM                | 107.7 ± 0.33     | 103 ± 1.08    | 103.3 ± 1.3  | 108 ± 0.71    | 108.6 ± 1.03 | 108.8 ± 0.66 | 109.3 ± 0.95 |
| HCO <sub>3</sub> , mM | 23.3 ± 0.95      | 24.8 ± 1.31   | 26.8 ± 1.11  | 22.6 ± 0.68   | 18.8 ± 0.92  | 22.2 ± 1.77  | 21.2 ± 0.86  |
| BUN, mg/dL            | 46 ± 1.78**      | 22.3 ± .63    | 23 ± 1.68    | 29.8 ± 2.67** | 26.5 ± 5.92  | 21.8 ± 0.97  | 20.2 ± 0.58  |

Supplemental Table 2b. Additional physiological data for amiloride-treated animals (Figure 2).

Data are presented as mean ± SEM. \* indicates P<0.05 by Mann-Whitney test.

|            | Treatment   |                      |
|------------|-------------|----------------------|
|            | HS/0.04K    | HS/0.04K + Amiloride |
| BW, g      | 26.4 ± 0.78 | 24.6 ± 0.82          |
| BUN, mg/dL | 18.8 ± 2.50 | 22.8 ± 3.07          |

Supplemental Table 3. Additional physiological data for aldosterone-infused animals (Figure 3).

Data are presented as mean  $\pm$  SEM. \*\* indicates  $P < 0.05$  by Kruskal-Wallis followed by Dunn's multiple comparison test vs Sham.

|                       | Treatment        |                   |                    |                    |
|-----------------------|------------------|-------------------|--------------------|--------------------|
|                       | Sham             | Aldo              | Aldo + HK          | Aldo + Amiloride   |
| BW, g                 | 32.3 $\pm$ 0.43  | 28.5 $\pm$ 0.24** | 27.5 $\pm$ 0.70**  | 32.6 $\pm$ 0.84    |
| Na, mM                | 144.4 $\pm$ 0.50 | 146.8 $\pm$ 0.48  | 153.6 $\pm$ 0.51** | 147.0 $\pm$ 0.45** |
| Cl, mM                | 108.8 $\pm$ 0.74 | 92.3 $\pm$ 1.25** | 111.2 $\pm$ 0.86   | 112.4 $\pm$ 0.51   |
| HCO <sub>3</sub> , mM | 23.7 $\pm$ 0.92  | 40.5 $\pm$ 1.76** | 30.2 $\pm$ 1.02    | 22.8 $\pm$ 0.2     |
| BUN, mg/dL            | 24.0 $\pm$ 0.60  | 16.0 $\pm$ 1.22** | 14.6 $\pm$ 1.33**  | 15.4 $\pm$ 0.75**  |



Supplemental Table 4. Additional physiological data for HCO<sub>3</sub>-reared animals (Figure 4). Data are presented as mean ± SEM. \* indicates P<0.05 by Mann-Whitney test.

|                                 | Treatment       |                               |
|---------------------------------|-----------------|-------------------------------|
|                                 | HS/0.04K + NaCl | HS/0.04K + NaHCO <sub>3</sub> |
| BW, g                           | 18.7 ± 0.46     | 17.5 ± 1.22                   |
| Na, mM                          | 152.8 ± 0.74    | 151.6 ± 1.86                  |
| BUN, mg/dL                      | 19.8 ± 2.22     | 23.2 ± 2.52                   |
| UNH <sub>4</sub> , mmol/mmol Cr | 25.7 ± 9.92     | 0.84 ± 0.76                   |

Supplemental Table 5. Additional physiological data for HS/0.04K-treated wild-type and Kir4.2 knockout animals (Figure 5a-g). Data are presented as mean  $\pm$  SEM. \* indicates P<0.05 by Mann-Whitney test vs WT at the indicated timepoint.

|                       | Wild-type         |                   | Kir4.2 knockout   |                   |
|-----------------------|-------------------|-------------------|-------------------|-------------------|
|                       | HS/0.04K - 3 days | HS/0.04K - 8 days | HS/0.04K - 3 days | HS/0.04K - 8 days |
| BW, g                 | 21.1 $\pm$ 0.22   | 22.8 $\pm$ 0.75*  | 20.1 $\pm$ 0.60   | 19.8 $\pm$ 1.08*  |
| Na, mM                | 147.0 $\pm$ 0.53  | 149.5 $\pm$ 0.50  | 147.2 $\pm$ 0.65  | 149.1 $\pm$ 0.84  |
| Cl, mM                | 110.4 $\pm$ 1.45  | 108.0 $\pm$ 0.80* | 112.6 $\pm$ 0.56  | 114.8 $\pm$ 1.07* |
| HCO <sub>3</sub> , mM | not measured      | not measured      | not measured      | not measured      |
| BUN, mg/dL            | not measured      | not measured      | not measured      | not measured      |

Supplemental Table 6. Additional physiological data for aldosterone-treated wild-type and Kir4.2 knockout animals (Figure 5h-k). Data are presented as mean  $\pm$  SEM. \* indicates  $P < 0.05$  by Mann-Whitney test.

|                       | Wild-type            | Kir4.2 knockout      |
|-----------------------|----------------------|----------------------|
| BW, g                 | 24.1 $\pm$ 0.46*     | 22.1 $\pm$ 0.59*     |
| kidney weight, g/g BW | 0.0148 $\pm$ 0.00027 | 0.0143 $\pm$ 0.00032 |
| Na, mM                | 147.5 $\pm$ 0.55*    | 144.2 $\pm$ 0.80*    |
| Cl, mM                | 102.7 $\pm$ 0.85*    | 107.3 $\pm$ 1.62*    |
| HCO <sub>3</sub> , mM | not measured         | not measured         |
| BUN, mg/dL            | not measured         | not measured         |

Supplemental Table 7. Additional physiological data for HS/0.04K-treated wild-type and KS GLS knockout animals (Figure 6). Data are presented as mean  $\pm$  SEM. \* indicates  $P < 0.05$  by Mann-Whitney test.

|            | Wild-type        | GLS knockout     |
|------------|------------------|------------------|
| BW, g      | 29.6 $\pm$ 0.56* | 32.1 $\pm$ 0.62* |
| Na, mM     | 145.8 $\pm$ 0.92 | 146.0 $\pm$ 1.30 |
| Cl, mM     | 104 $\pm$ 0.89   | 105.4 $\pm$ 0.40 |
| BUN, mg/dL | 23.4 $\pm$ 1.69  | 25.0 $\pm$ 0.89  |

Supplemental Table 8. TaqMan™ qPCR probes

| <b>Transcript</b> | <b>Source</b> | <b>Identifier</b> |
|-------------------|---------------|-------------------|
| TNFa              | Thermo Fisher | Mm99999068        |
| iNOS              | Thermo Fisher | Mm00440502        |
| IL1a              | Thermo Fisher | Mm00439621        |
| IL1b              | Thermo Fisher | Mm00434228        |
| IL6               | Thermo Fisher | Mm00446190        |
| IL23              | Thermo Fisher | Mm00518984        |
| CCL2              | Thermo Fisher | Mm00441242        |
| Kim1              | Thermo Fisher | Mm00506686        |
| NGAL              | Thermo Fisher | Mm01324470        |
| Col1a1            | Thermo Fisher | Mm00801666        |
| Col3a1            | Thermo Fisher | Mm01254476        |
| FN                | Thermo Fisher | Mm01256744        |
| aSMA              | Thermo Fisher | Mm01546133        |
| TGFb1             | Thermo Fisher | Mm01178820        |
| RPS18             | Thermo Fisher | Mm02601777        |
| GLS1              | Thermo Fisher | Mm01257297        |
| CD68              | Thermo Fisher | Mm03047343        |
| F4/80             | Thermo Fisher | Mm00802529        |
| CD11b             | Thermo Fisher | Mm00434455        |
| CD11c             | Thermo Fisher | Mm00498701        |
| Ly6G              | Thermo Fisher | Mm04934123        |
| CD3d              | Thermo Fisher | Mm00442746        |
| CD4               | Thermo Fisher | Mm00442754        |
| CD8a              | Thermo Fisher | Mm01182107        |

Supplemental Table 9. Genotyping Oligonucleotides

| <b>Sequence</b>             | <b>Source</b> | <b>Identifier</b> |
|-----------------------------|---------------|-------------------|
| GGTAGGAGATTAACACCATACTG     | Sigma         | Kir4.2 F          |
| GAGAGTCCACTTTCATAATGCAG     | Sigma         | Kir4.2 R          |
| GGCCTGCTTAATGTTTCCTG        | Sigma         | GLS floxed F      |
| GGCATATCCCTGAGTTCGAG        | Sigma         | GLS floxed R      |
| CCA TGT CTA GAC TGG ACA AGA | Sigma         | Pax8 F            |
| CTC CAG GCC ACA TAT GAT TAG | Sigma         | Pax8 R            |
| TGGGCGGCATGGTGCAAGTT        | Sigma         | LC1 F             |
| CGGTGCTAACCAGCGTTTTTC       | Sigma         | LC1 R             |
